# Supplementary material for: Proximity labeling reveals dynamic changes in the SQSTM1 protein network
Source: PubMed Central journal article supplement (PMC11401034; doi:10.1016/j.jbc.2024.107621), 2024-08-03

# Fig2A-Western blots

IP

INPUT

KEAP1

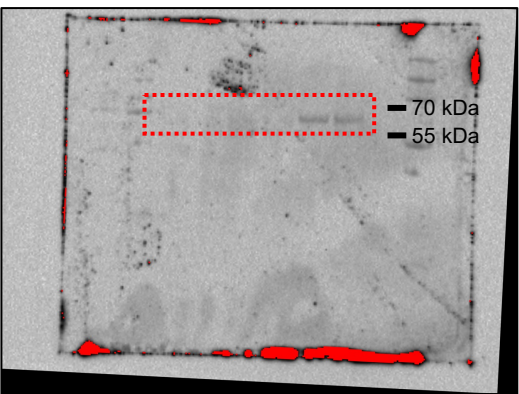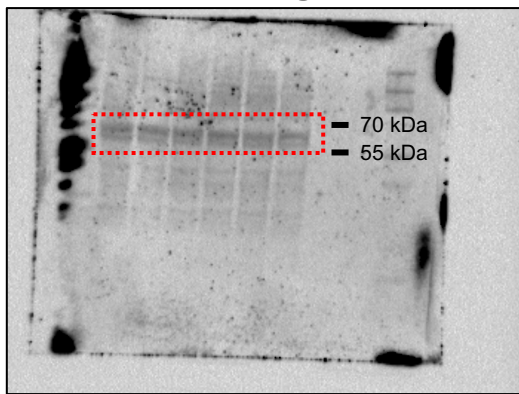

SQSTM1

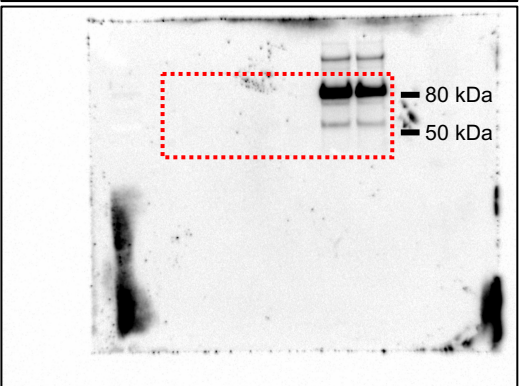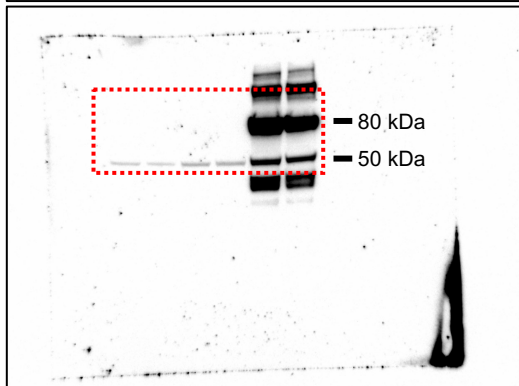

UBIQUITIN

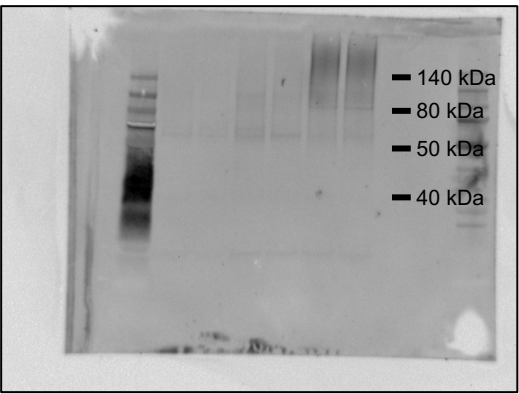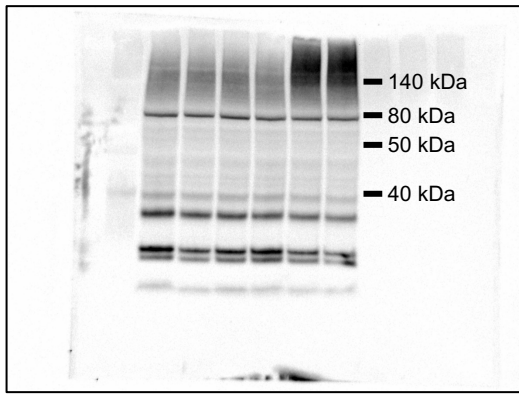

FLAG

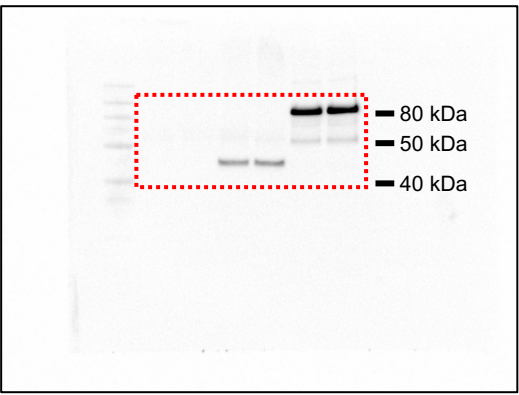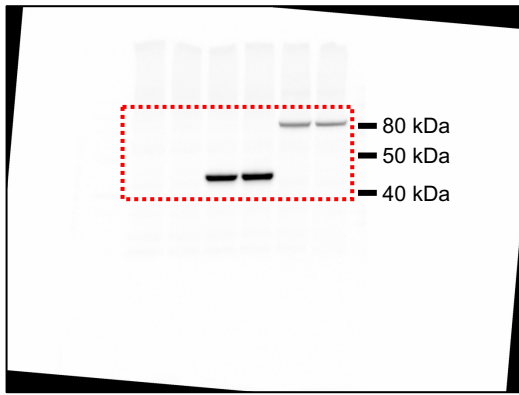

# Fig2A-Western blots

IP

INPUT

Streptavidin

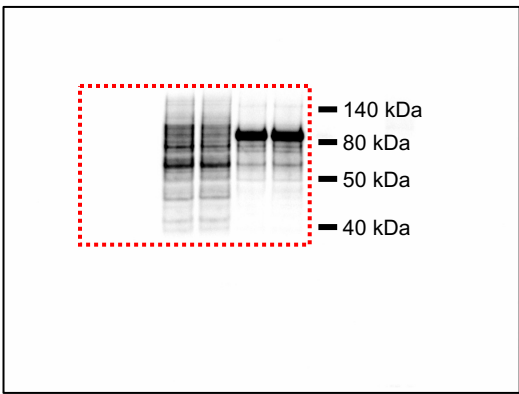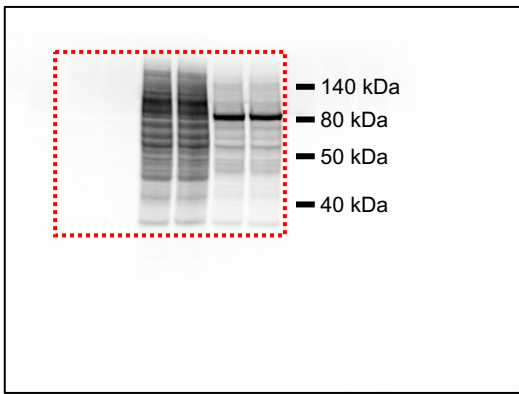

# Fig2C-Western blots

IP

INPUT

HA  
(HA-LC3B)

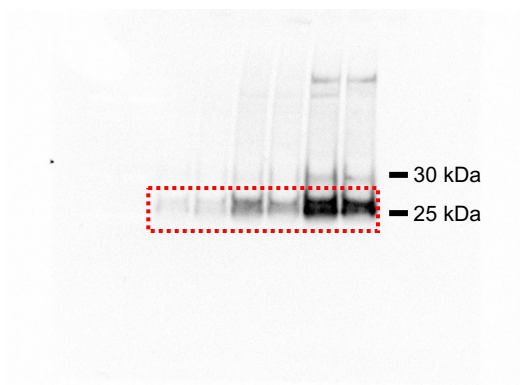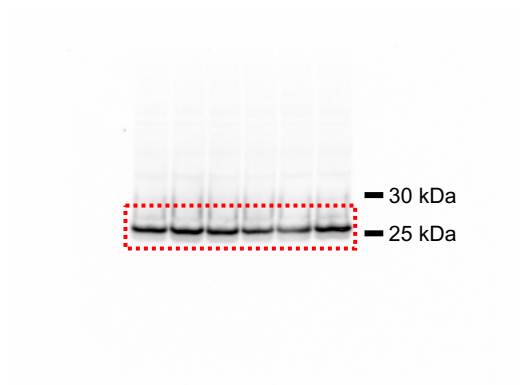

FLAG

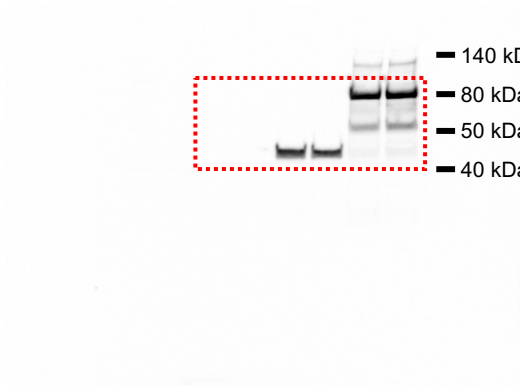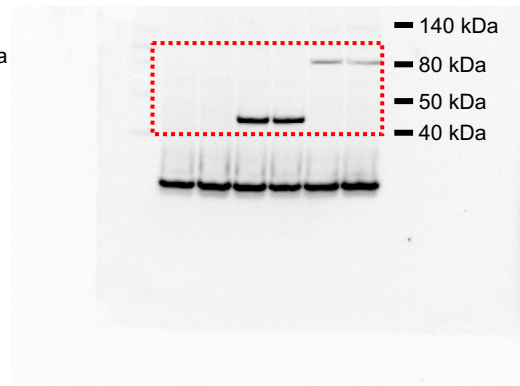

Streptavidin

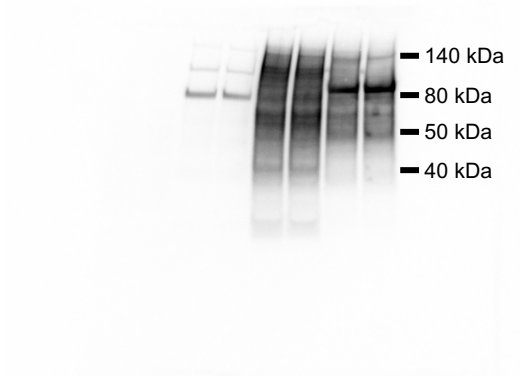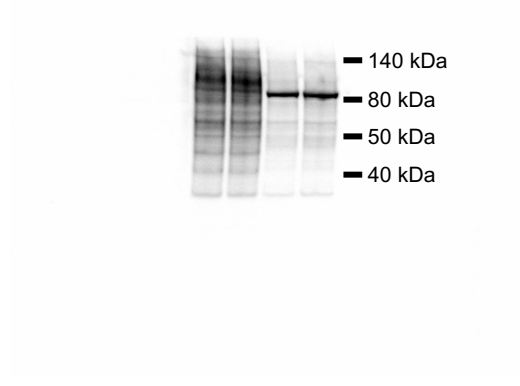

# Fig2D-Western blots

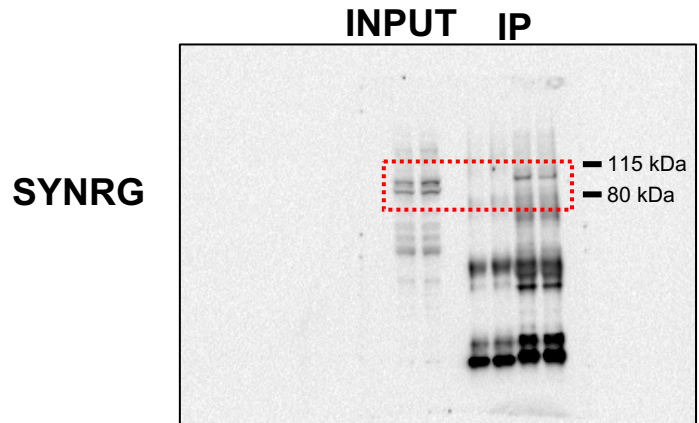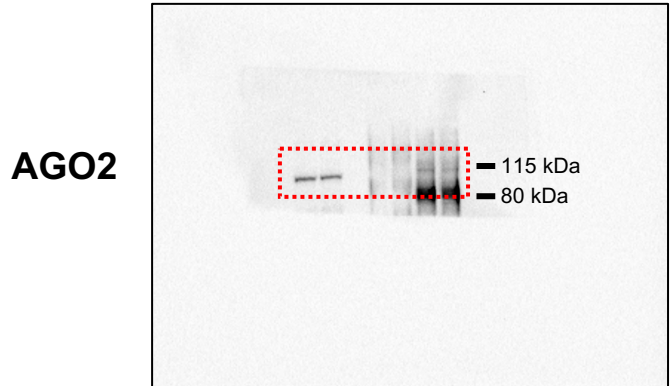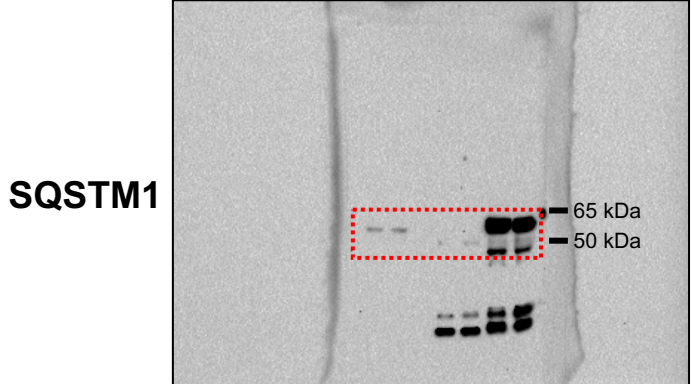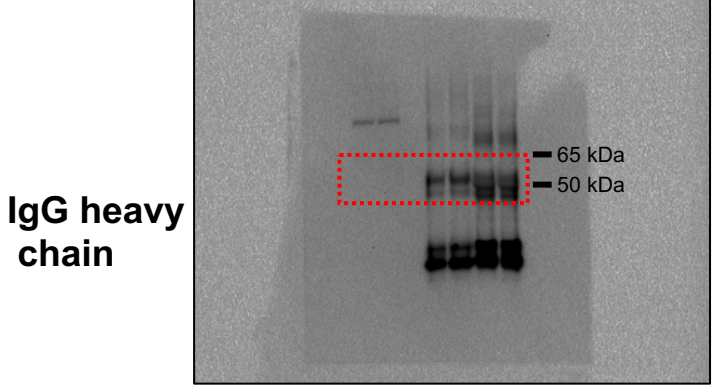

# Fig2F-Western blots

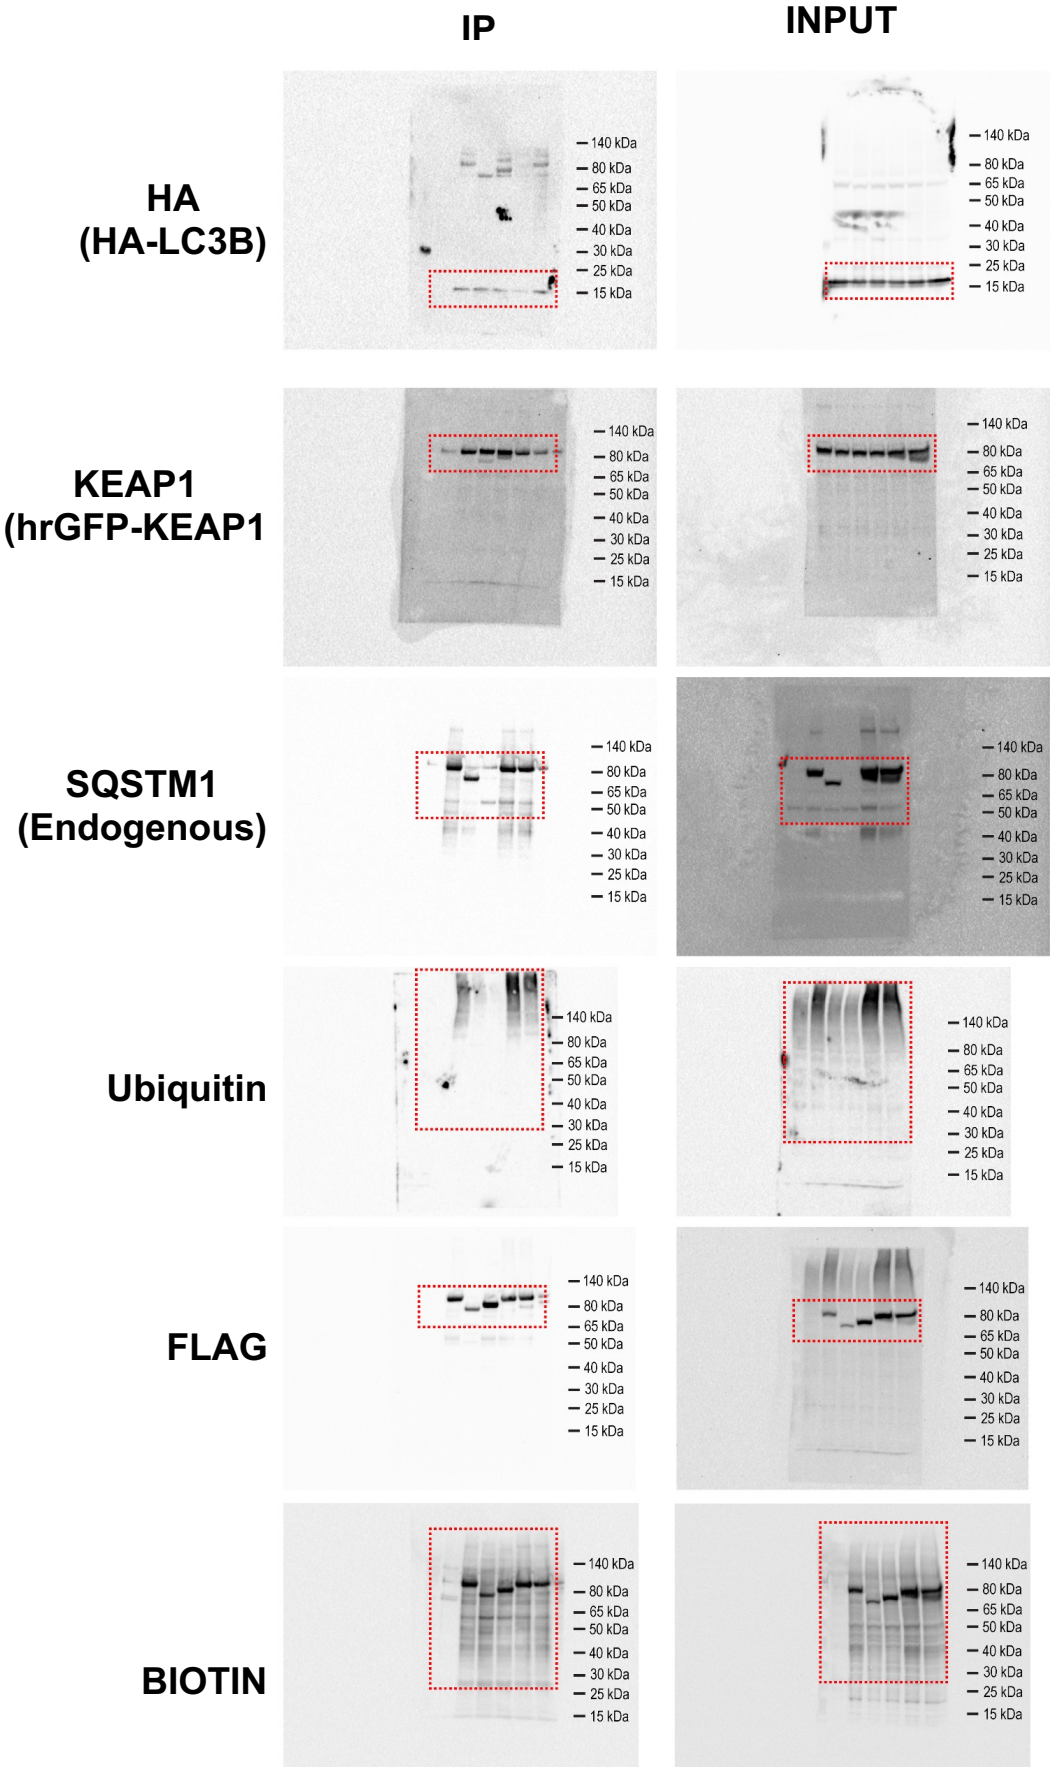



# Fig2G-Western blots

IP

INPUT

AGO2

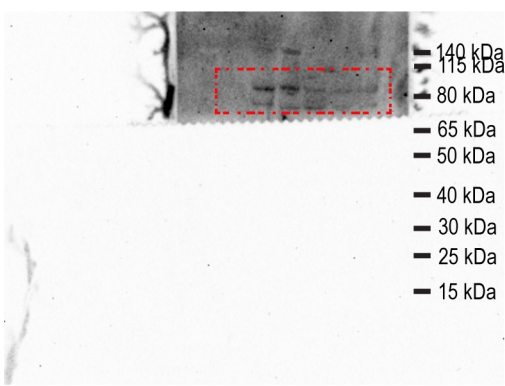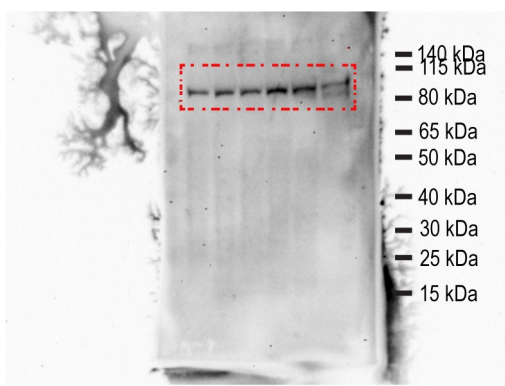

SYNRG

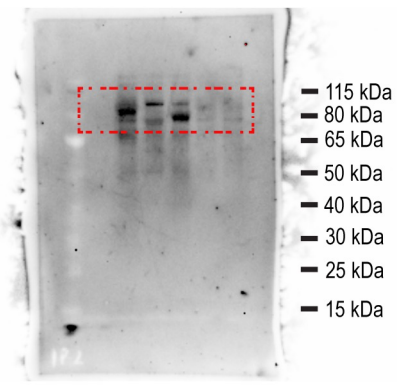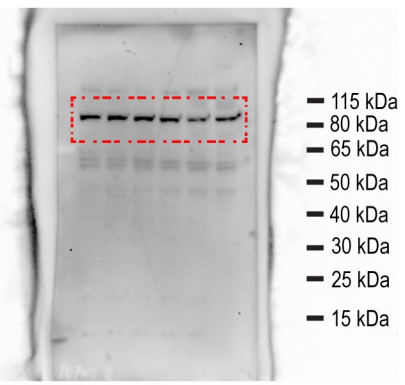

FLAG

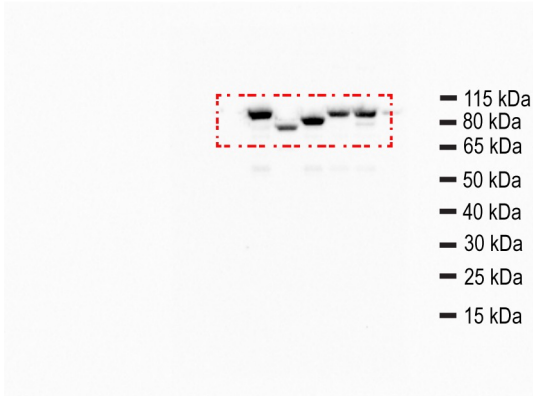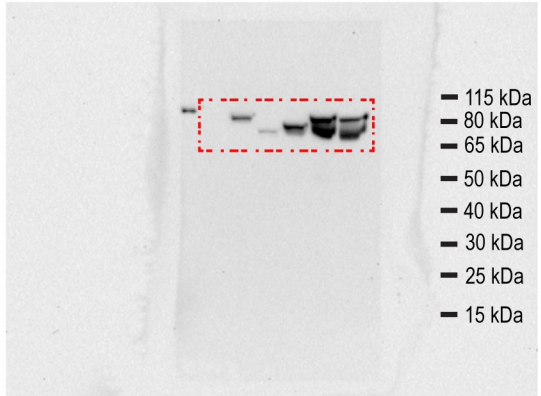

Streptavidin-  
HRP

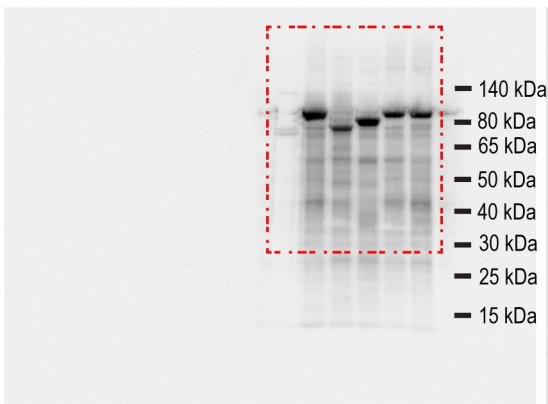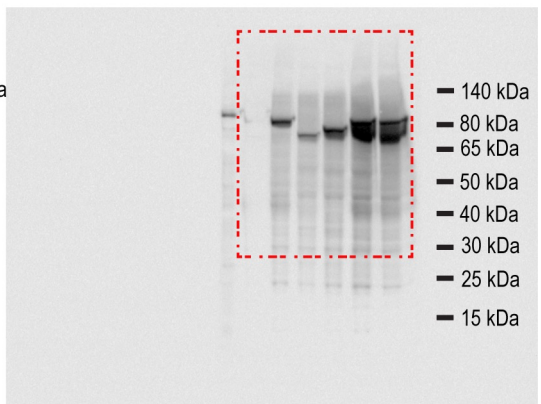

# Fig4A-Western blots

**FLAG**

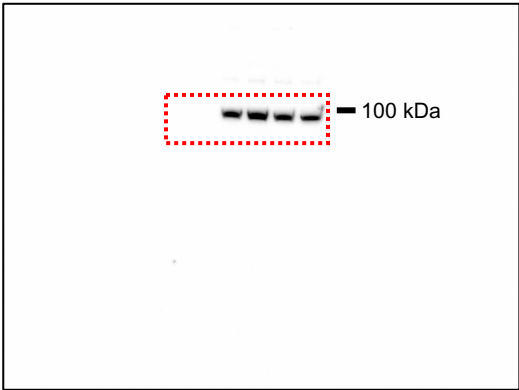

**Ubiquitin**

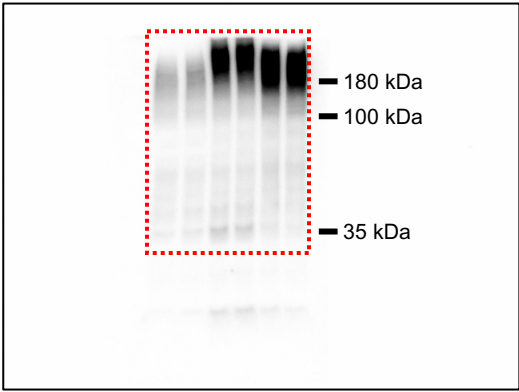

**Streptavidin**

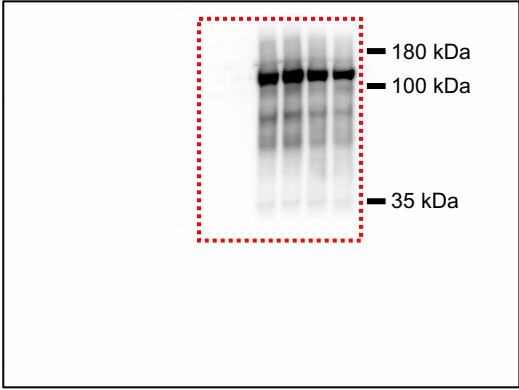

# Fig5D-Western blots

**FLAG**

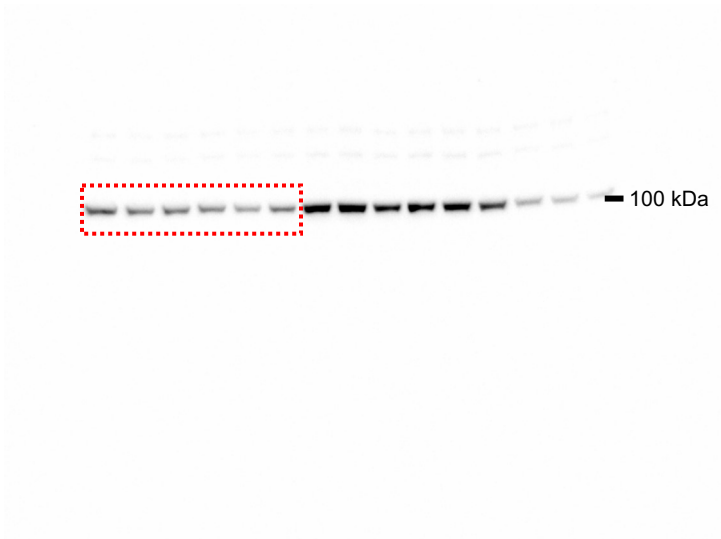

**Streptavidin**

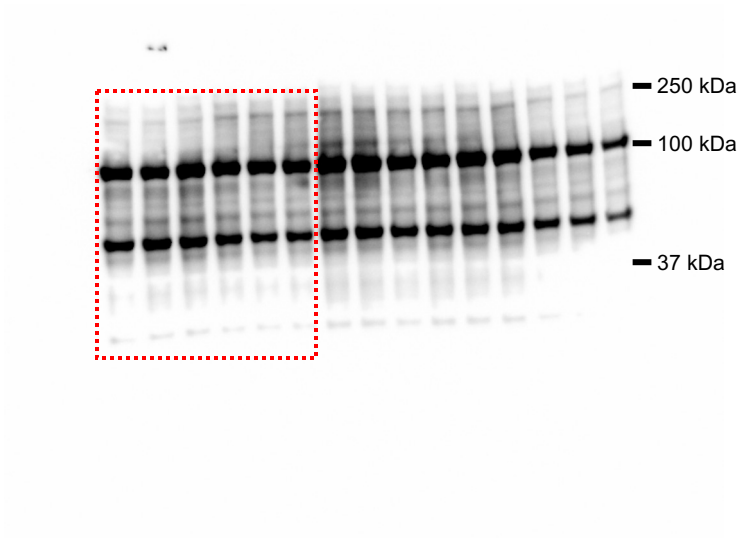



# Fig6B-Western blots

IP

INPUT

CALR

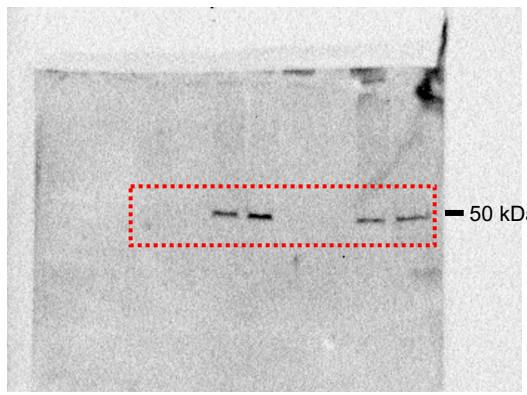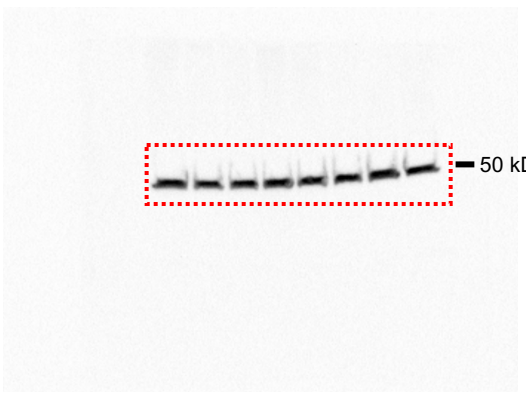

GFP  
(CFP::Tau/  
YFP::Tau)

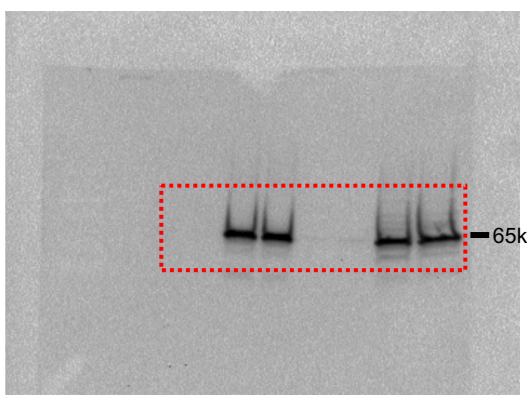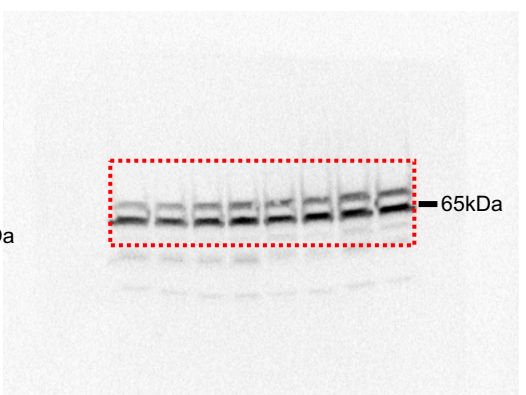

FLAG

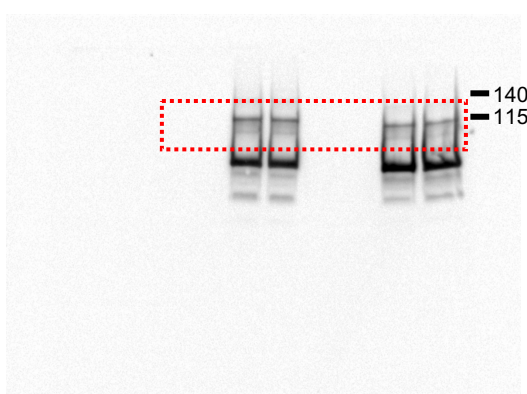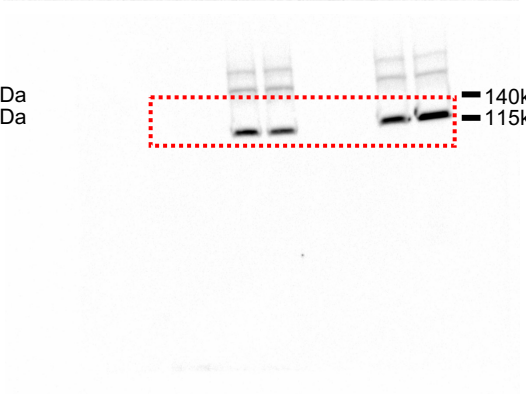

Streptadivin

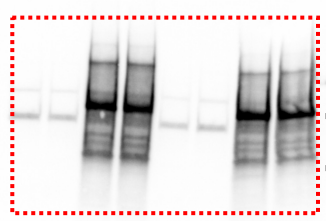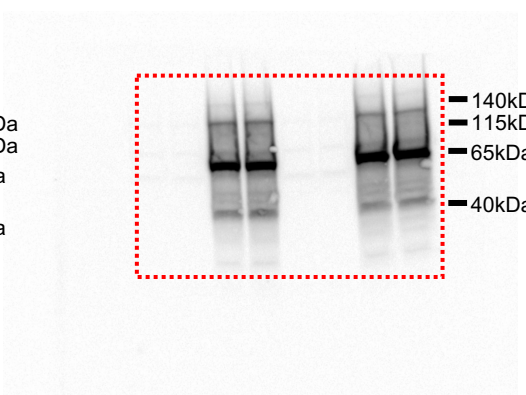

# Fig6F-Western blots

IP

INPUT

GFP  
(CFP::Tau/  
YFP::Tau)

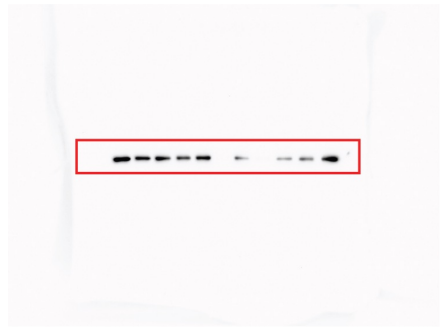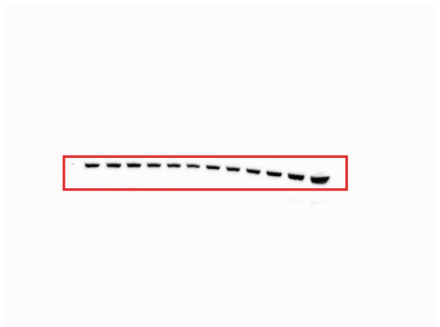

FLAG

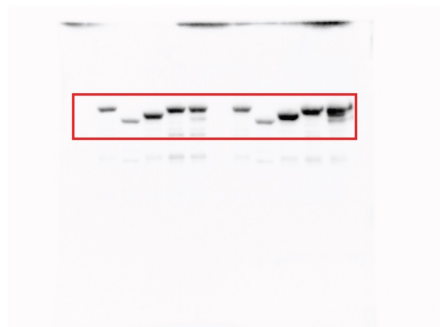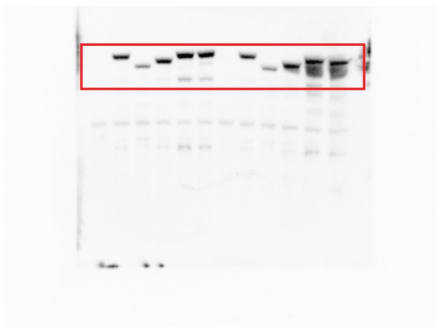

Streptavidin

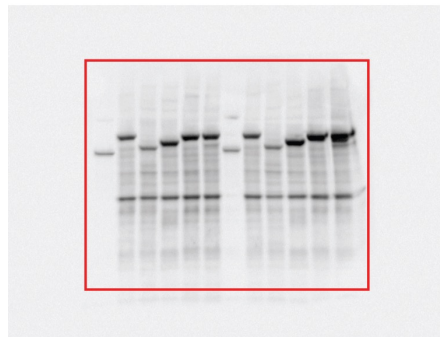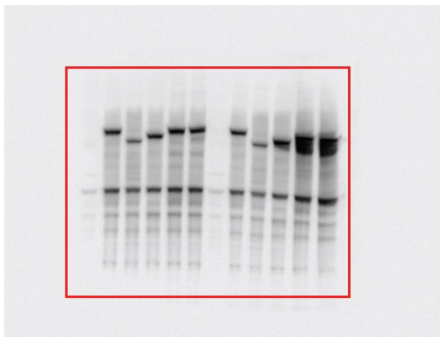

Supplement: mmc1.pdf [file mmc1.pdf]
